# Supplementary material
Source: PubMed Central journal article supplement (PMC6704608)
Supplement: IAI.00377-19-s0001.pdf [file IAI.00377-19-s0001.pdf]

**Supplemental Information for:**

**Identification of an autorepressing two-component signaling system that modulates virulence in *Streptococcus suis* serotype 2**

Xiaojun Zhong,<sup>a,b,c#</sup> Yue Zhang,<sup>a,b,c#</sup> Yinchu Zhu,<sup>a,b,c</sup> Wenyang Dong,<sup>a,b,c</sup> Jiale Ma,<sup>a,b,c</sup> Zihao Pan,<sup>a,b,c</sup> and Huochun Yao<sup>a,b,c,\*</sup>

<sup>a</sup> College of Veterinary Medicine, Nanjing Agricultural University, Nanjing 210095, China

<sup>b</sup> OIE Reference Lab for Swine Streptococcosis, Nanjing 210095, China

<sup>c</sup> Key Lab of Animal Bacteriology, Ministry of Agriculture, Nanjing 210095, China

**Supplemental Table S1. Differentially expressed genes in the  $\Delta TCS09HKRR$  strain versus WT strain**

| Gene/locus name      | Function or description                | log2<br>Fold Change | p-value   | q-value   |
|----------------------|----------------------------------------|---------------------|-----------|-----------|
| <i>ZY05719_00870</i> | molecular chaperone GroEL              | -1.0405             | 1.13E-24  | 1.01E-22  |
| <i>ZY05719_01235</i> | thioredoxin                            | -1.1314             | 5.26E-06  | 9.48E-05  |
| <i>ZY05719_02230</i> | PTS fructose transporter subunit IIC   | -1.0463             | 0.012503  | 0.049462  |
| <i>ZY05719_02235</i> | PTS fructose transporter subunit IID   | -1.1408             | 0.00306   | 0.017383  |
| <i>cps2A</i>         | LytR family transcriptional regulator  | -2.8175             | 6.72E-75  | 1.20E-72  |
| <i>cps2B</i>         | capsular biosynthesis protein CpsC     | -3.0338             | 1.26E-93  | 2.74E-91  |
| <i>cps2C</i>         | tyrosine protein kinase                | -2.9877             | 1.53E-62  | 2.50E-60  |
| <i>cps2D</i>         | tyrosine protein phosphatase           | -3.2172             | 5.84E-50  | 8.81E-48  |
| <i>cps2E</i>         | galactosyl transferase                 | -2.9235             | 2.42E-29  | 2.64E-27  |
| <i>cps2F</i>         | glycosyl transferase                   | -2.974              | 3.67E-35  | 4.50E-33  |
| <i>cps2G</i>         | glycosyl transferase family 1          | -2.9174             | 3.26E-27  | 3.37E-25  |
| <i>cps2H</i>         | glycosyl transferase                   | -2.7401             | 4.78E-19  | 3.61E-17  |
| <i>cps2I</i>         | polymerase                             | -2.718              | 9.88E-24  | 8.08E-22  |
| <i>cps2J</i>         | glycosyl transferase                   | -2.7782             | 4.61E-30  | 5.31E-28  |
| <i>cps2K</i>         | glycosyl transferase                   | -2.8808             | 7.10E-81  | 1.39E-78  |
| <i>ZY05719_02805</i> | membrane protein                       | -3.1185             | 3.37E-157 | 2.20E-154 |
| <i>ZY05719_02830</i> | lipooligosaccharide sialyltransferase  | -3.0466             | 7.66E-105 | 3.01E-102 |
| <i>ZY05719_02835</i> | capsid assembly protein                | -2.9467             | 8.93E-117 | 4.38E-114 |
| <i>neuB</i>          | N-acetyl neuramic acid synthetase NeuB | -2.2941             | 3.97E-102 | 1.30E-99  |
| <i>neuC</i>          | UDP-N-acetylglucosamine 2-epimerase    | -2.204              | 2.17E-95  | 5.32E-93  |
| <i>neuD</i>          | NeuD protein                           | -2.2597             | 1.99E-96  | 5.58E-94  |

|               |                                                                   |         |          |            |
|---------------|-------------------------------------------------------------------|---------|----------|------------|
| <i>neuA</i>   | acylneuraminate cytidyltransferase                                | -2.2983 | 1.54E-49 | 2.16E-47   |
| ZY05719_02860 | transposase                                                       | -2.29   | 2.01E-37 | 2.63E-35   |
| ZY05719_02865 | transposase                                                       | -2.5799 | 2.67E-16 | 1.80E-14   |
| ZY05719_03810 | phosphoribosyl transferase                                        | -1.2901 | 2.51E-24 | 2.14E-22   |
| ZY05719_03815 | aspartate carbamoyltransferase catalytic subunit                  | -1.0469 | 6.92E-21 | 5.43E-19   |
| ZY05719_03965 | PTS fructose transporter subunit IIC                              | -1.4535 | 0.004108 | 0.021713   |
| ZY05719_04270 | antitoxin                                                         | -1.0531 | 0.002388 | 0.014407   |
| ZY05719_04895 | dihydroorotate dehydrogenase                                      | -1.0679 | 1.65E-16 | 1.16E-14   |
| ZY05719_04900 | dihydroorotate dehydrogenase                                      | -1.1242 | 4.34E-18 | 3.15E-16   |
| ZY05719_05820 | preprotein translocase subunit YajC                               | -1.4315 | 1.14E-05 | 0.000186   |
| ZY05719_05830 | PTS system N-acetylgalactosamine-specific transporter subunit IIC | -1.0804 | 0.011796 | 0.047313   |
| ZY05719_07065 | 6-phospho-beta-glucosidase                                        | -1.3878 | 4.81E-07 | 1.12E-05   |
| ZY05719_07070 | PTS beta-glucoside transporter subunit IIABC                      | -1.4273 | 9.57E-11 | 4.36E-09   |
| ZY05719_07075 | transcription antiterminator BglG                                 | -1.4656 | 3.15E-09 | 1.17E-07   |
| ZY05719_09180 | uracil permease                                                   | -1.1167 | 7.08E-26 | 6.95E-24   |
| ZY05719_09295 | glycerol transporter                                              | -1.2933 | 0.009319 | 0.040076   |
| ZY05719_09640 | carbonate dehydratase                                             | -1.0936 | 2.20E-25 | 2.06E-23   |
| ZY05719_09785 | amylopullulanase                                                  | -1.1716 | 0.000111 | 0.001214   |
| ZY05719_00315 | multidrug ABC transporter ATPase                                  | 1.3881  | 0.00111  | 0.0078293  |
| ZY05719_00650 | tRNA-Leu                                                          | 1.3     | 0.000434 | 0.0037674  |
| ZY05719_00655 | integrase                                                         | 1.2458  | 0.005216 | 0.02598    |
| ZY05719_00665 | Cro/C1 family transcriptional regulator                           | 1.5613  | 0.000964 | 0.007002   |
| ZY05719_00770 | competence protein CglA                                           | 2.0128  | 1.10E-05 | 0.00018148 |

|               |                                                   |        |          |            |
|---------------|---------------------------------------------------|--------|----------|------------|
| ZY05719_00775 | competence protein CglB                           | 2.198  | 8.70E-06 | 0.00014714 |
| ZY05719_00800 | hypothetical protein                              | 2.8635 | 0.004559 | 0.023529   |
| ZY05719_01015 | 6-phospho-beta-glucosidase                        | 1.3375 | 3.75E-08 | 1.10E-06   |
| ZY05719_01650 | adhesion protein                                  | 1.2416 | 1.37E-09 | 5.37E-08   |
| ZY05719_01670 | tRNA-Leu                                          | 1.0607 | 0.001904 | 0.012005   |
| ZY05719_02900 | transcriptional regulator                         | 1.9006 | 3.82E-05 | 0.00052013 |
| ZY05719_03485 | pyridine nucleotide-disulfide oxidoreductase      | 1.3402 | 6.10E-06 | 0.00010689 |
| ZY05719_03495 | glycerol kinase                                   | 1.1965 | 0.003365 | 0.018745   |
| ZY05719_03550 | phosphomethylpyrimidine kinase                    | 1.0338 | 0.003347 | 0.018714   |
| ZY05719_04460 | conjugal transfer protein                         | 2.4518 | 3.34E-06 | 6.43E-05   |
| ZY05719_04475 | ATP/GTP-binding protein                           | 1.9111 | 2.19E-08 | 6.91E-07   |
| ZY05719_04495 | Cro/C1 family transcriptional regulator           | 1.5743 | 0.002286 | 0.013923   |
| ZY05719_04500 | cell division protein FtsK                        | 1.8085 | 0.00294  | 0.016855   |
| ZY05719_04670 | hypothetical protein                              | 1.3726 | 9.42E-09 | 3.24E-07   |
| ZY05719_04685 | glucan-binding protein                            | 1.3364 | 3.69E-07 | 8.94E-06   |
| ZY05719_04700 | amidase                                           | 1.0905 | 0.000357 | 0.003204   |
| ZY05719_04705 | ATPase AAA                                        | 1.7164 | 1.54E-06 | 3.27E-05   |
| ZY05719_04715 | conjugal transfer protein TrbL                    | 1.874  | 0.001808 | 0.011474   |
| ZY05719_04725 | conjugal transfer protein TraG                    | 1.9138 | 9.09E-05 | 0.0010485  |
| ZY05719_04765 | modification methylase                            | 1.5773 | 0.009722 | 0.041267   |
| ZY05719_04775 | replication initiator protein                     | 2.3006 | 9.79E-08 | 2.67E-06   |
| ZY05719_05075 | hypothetical protein                              | 1.2374 | 0.000718 | 0.005478   |
| ZY05719_05585 | 2-dehydro-3-deoxygluconokinase                    | 1.3898 | 0.000643 | 0.0050605  |
| ZY05719_05590 | glucuronide permease                              | 1.0105 | 0.010717 | 0.044273   |
| ZY05719_06890 | type I restriction-modification protein subunit S | 1.7054 | 7.90E-06 | 0.00013479 |
| ZY05719_07190 | DNA primase                                       | 1.2634 | 1.38E-05 | 0.00021591 |

|                      |                                                 |        |          |            |
|----------------------|-------------------------------------------------|--------|----------|------------|
| <i>ZY05719_07215</i> | hypothetical protein                            | 1.7578 | 0.006491 | 0.031046   |
| <i>ZY05719_07220</i> | hypothetical protein                            | 1.6353 | 0.009048 | 0.039255   |
| <i>ZY05719_09065</i> | sugar ABC transporter substrate-binding protein | 1.042  | 0.001031 | 0.0073     |
| <i>ZY05719_09080</i> | N-acetyl-beta-D-glucosaminidase                 | 1.442  | 1.76E-07 | 4.60E-06   |
| <i>ZY05719_09085</i> | ROK family transcriptional regulator            | 1.45   | 0.000913 | 0.0067063  |
| <i>ZY05719_09090</i> | alpha-mannosidase                               | 1.5202 | 7.35E-10 | 3.07E-08   |
| <i>ZY05719_09095</i> | glycosyl hydrolase                              | 1.4175 | 1.36E-05 | 0.00021536 |
| <i>ZY05719_09105</i> | endo-beta-N-acetylglucosaminidase               | 1.0435 | 8.73E-11 | 4.07E-09   |
| <i>ZY05719_09850</i> | diacetylchitobiose-6-phosphate hydrolase        | 1.1952 | 4.46E-06 | 8.26E-05   |

---

**Supplemental Table S2. Bacterial strains and plasmids used in this study**

| Strains or plasmids         | Description <sup>a</sup>                                                                            | Source or reference |
|-----------------------------|-----------------------------------------------------------------------------------------------------|---------------------|
| Bacterial strains           |                                                                                                     |                     |
| ZY05719                     | The SS2 strain was isolated from a diseased pig                                                     | Our laboratory      |
| $\Delta TCS09HKRR$          | Deletion mutant of <i>TCS09HKRR</i> with ZY05719 background                                         | This study          |
| $C\Delta TCS09HKRR$         | $\Delta TCS09HKRR$ with the vector pSET2- <i>TCS09HKRR</i> , Spc <sup>r</sup>                       | This study          |
| $\Delta TCS09HK$            | Deletion mutant of <i>TCS09HK</i> with ZY05719 background                                           | This study          |
| $\Delta TCS09RR$            | Deletion mutant of <i>TCS09RR</i> with ZY05719 background                                           | This study          |
| $\Delta TCS09HK-HAMP$       | Deletion mutant of TCS09HK HAMP domain with ZY05719 background                                      | This study          |
| <i>E. coli</i> DH5 $\alpha$ | Cloning host for maintaining the recombinant plasmids                                               | Invitrogen          |
| <i>E. coli</i> BL21 (DE3)   | Host for expressing the recombinant proteins                                                        | Invitrogen          |
| Plasmids                    |                                                                                                     |                     |
| pSET4S                      | Temperature-sensitive suicide vector for <i>S. suis</i> mutagenesis, Spc <sup>r</sup>               | (1)                 |
| pSET4S- <i>TCS09HKRR</i>    | Derived from pSET4S used to knock out <i>TCS09HKRR</i> in ZY05719, Spc <sup>r</sup>                 | This study          |
| pSET4S- <i>TCS09HK</i>      | Derived from pSET4S used to knock out <i>TCS09HK</i> in ZY05719, Spc <sup>r</sup>                   | This study          |
| pSET4S- <i>TCS09RR</i>      | Derived from pSET4S used to knock out <i>TCS09RR</i> in ZY05719, Spc <sup>r</sup>                   | This study          |
| pSET4S- <i>TCS09HK-HAMP</i> | Derived from pSET4S used to knock out <i>TCS09HK-HAMP</i> in ZY05719, Spc <sup>r</sup>              | This study          |
| pSET2                       | <i>E. coli</i> - <i>S. suis</i> shuttle vector for <i>S. suis</i> complementation, Spc <sup>r</sup> | (2)                 |
| pSET2- <i>TCS09HKRR</i>     | pSET2 containing the promoter followed by the full-length <i>TCS09HKRR</i> ORF, Spc <sup>r</sup>    | This study          |
| pCold II                    | His-tag expressing vector, Amp <sup>r</sup>                                                         | Invitrogen          |
| pCold II- <i>TCS09RR</i>    | pCold II inserted in-frame with the <i>TCS09RR</i> gene for expressing TCS09RR, Amp <sup>r</sup>    | This study          |

<sup>a</sup>Spc<sup>r</sup>, spectinomycin resistant; Amp<sup>r</sup>, Ampicillin resistant.

**Supplemental Table S3. Primers used in this study**

| Primers                       | Primers sequence (5'-3')                    |
|-------------------------------|---------------------------------------------|
| For deletion                  |                                             |
| Del-TCS09hkrr-Upstream-F      | GAGTCAGA <u>AATTC</u> CTTACCATCCATCCGTTTAG  |
| Del-TCS09hkrr-Upstream-R      | GCACAGGAAAAG GGTTGGTTA                      |
| Del-TCS09hkrr-Downstream-F    | CTTTTCCTGTGC CGGCACCTTTCTTTTTTCAA           |
| Del-TCS09hkrr-Downstream-R    | CTGATC <u>GTCGAC</u> AAGGCCTTATCCAGTCCTAC   |
| Del-TCS09rr-Upstream-F        | GAGTCAGA <u>AATTC</u> CTTACCATCCATCCGTTTAG  |
| Del-TCS09rr-Upstream-R        | GCACAGGAAAAG GGTTGGTTA                      |
| Del-TCS09rr-Downstream-F      | CTTTTCCTGTGC TTGGTCTTCTGCGACTAAGAT          |
| Del-TCS09rr-Downstream-R      | CTGATC <u>GTCGAC</u> TTTTGGGGCAATCTGCAATTT  |
| Del-TCS09hk-Upstream-F        | GAGTCAGA <u>AATTC</u> GCGCCTAGCTTGGACAGGATA |
| Del-TCS09hk-Upstream-R        | CGAATTCGGTTT GAGGAGGTG                      |
| Del-TCS09hk-Downstream-F      | AAACGGAATTCG CGGCACCTTTCTTTTTTCAA           |
| Del-TCS09hk-Downstream-R      | CTGATC <u>GTCGAC</u> AAGGCCTTATCCAGTCCTAC   |
| Del-TCS09hk-HAMP-Upstream-F   | GAGTCAGA <u>AATTC</u> GACTAGCTCCAAAGGTTTGGG |
| Del-TCS09hk-HAMP-Upstream-R   | AAGCGGGAAGCC CTCAGCAA                       |
| Del-TCS09hk-HAMP-Downstream-F | GGCTTCCCGCTT GACCATGCCCACGAAGAACAT          |
| Del-TCS09hk-HAMP-Downstream-R | CTGATC <u>GTCGAC</u> TATTGAGCAGGTTTGGGCTAG  |
| For identification            |                                             |
| TCS09rr-identification-F      | CTAACCAACCCTTTTCCTGTG                       |
| TCS09rr-identification-R      | GCAATGCTGCGGGACGCCCTC                       |
| TCS09hk-identification-F      | GGCATCTGCTAGCCTGACTGT                       |
| TCS09hk-identification-R      | TTTTGGGGCAATCTGCAATTT                       |
| TCS09hk-HAMP-identification-F | GTGGATAACAAGTGCAAAAGC                       |

---

|                                      |                                           |
|--------------------------------------|-------------------------------------------|
| TCS09hk-HAMP-identification-R        | TATTGAGCAGGTTTGGGCTAG                     |
| For complementation                  |                                           |
| TCS09hkrr complementation-F          | <u>CGGGATCC</u> ATGCCCAATCTCATTCGTTTA     |
| TCS09hkrr complementation-R          | AA <u>CTGCAG</u> TGACATTTGTCACATGAGTCC    |
| For TCS09RR expression               |                                           |
| TCS09rr pCold-F                      | <u>CGGAATTC</u> TTATACTAACCAACCCTTTTCCTG  |
| TCS09rr pCold-R                      | CG <u>GGATCC</u> ATGAGAATCTTAGTCGCAGAAGAC |
| For checking <i>TCS09hkrr</i> operon |                                           |
| rr-hk-F                              | TCTTTTTCCAAAAGAGCAATG                     |
| rr-hk-R                              | GATTTTACAGCAGATGTTGGA                     |
| hk-30-F                              | CCAAAACTCATGACGGCGAT                      |
| hk-30-R                              | GCAAATCCAGTCTGAACAGGC                     |
| 30-35-F                              | CAAAGCCCGACATGGAAAAAC                     |
| 30-35-R                              | TACGGCGGAGCGGATTTTGGT                     |
| For EMSA                             |                                           |
| TCS09hkrr(D1/D2/D3) EMSA-F           | GACTTCGTTTCCTAGGCTACT                     |
| TCS09hkrr(D1/D2/D3) EMSA-R           | TTTTCTACCTCCTACTTCTTG                     |
| cps EMSA-F                           | ATTATGACCAAGAAGTTGGTG                     |
| cps EMSA-R                           | TATTCAAAGCCATCCACCTTA                     |
| neu EMSA-F                           | CTTCCACCAATCTATTGAAGA                     |
| neu EMSA-R                           | ATTACAACCAATTTCTGCAAT                     |
| 16s EMSA-F                           | CGAGCGCAGGCGGTTTGATAA                     |

---



---

|                                                      |                                     |
|------------------------------------------------------|-------------------------------------|
| 16s EMSA-R                                           | CTCATCGTTTACGGCGTGGAC               |
| D1-Upstream-F                                        | AGATGGATGAATATATGGAAGAAA            |
| D1-Upstream-R                                        | ATTATACTCAAT GAAAATCAAAAG           |
| D1-Downstream-F                                      | ATTGAGTATAAT CAAAGGCTTCTA GTGGGGTCT |
| D1-Downstream-R                                      | TGTCGATTTCCACATCTGTCA               |
| D2-Upstream-F                                        | AGATGGATGAATATATGGAAGAAA            |
| D2-Upstream-R                                        | ATTATACTCAAT GAAAATCAAAAG           |
| D2-Downstream-F                                      | ATTGAGTATAAT ATGAGTCCATGACAAAGGCTT  |
| D2-Downstream-R                                      | TGTCGATTTCCACATCTGTCA               |
| D3-Upstream-F                                        | AGATGGATGAATATATGGAAGAAA            |
| D3-Upstream-R                                        | GGACTCATGTGA CAAATGTCATAT           |
| D3-Downstream-F                                      | TCACATGAGTCC CAAAGGCTTCTA GTGGGGTCT |
| D3-Downstream-R                                      | TGTCGATTTCCACATCTGTCA               |
| D1/D2/D3-overlap extension-F                         | TGGAAGAAATTGATGGTTATT               |
| D1/D2/D3-overlap extension-R                         | ATCCTTGTAATAGCTTGGAA                |
| For quantitative real-time reverse transcription-PCR |                                     |
| TCS09rr (08020) qPCR-F                               | CCTCTGTCAGCTCTTGTGTT                |
| TCS09rr (08020) qPCR-R                               | CACCACATCTACTGGCTCTTT               |
| TCS09hk (08025) qPCR-F                               | CTATGCCCAGTATAGTCCCAATC             |
| TCS09hk (08025) qPCR-R                               | GAATAGAGCTTGTGGTCGGTATAA            |
| 08030 qPCR-F                                         | CTGGCACTACTACCTATCCAAAC             |
| 08030 qPCR-R                                         | CCTGAGCTGACAAATCTACTCC              |
| 08035 qPCR-F                                         | GGCTCAGGGTGTGACTATTT                |
| 08035 qPCR-R                                         | AGCAAATGGCGTGGTATCT                 |
| 07580 qPCR-F                                         | CATCCCGTGTGCCCATAT                  |

---

---

|                      |                         |
|----------------------|-------------------------|
| 07580 qPCR-R         | GCCAGGAGAACCGTCATT      |
| 06495 qPCR-F         | GTGACCAAGCCCTTCTCTAATC  |
| 06495 qPCR-R         | CAAATCGCCAATCACCAACTC   |
| 04260 qPCR-F         | ACATGGGTGGCGATGATTT     |
| 04260 qPCR-R         | CGCTCGATTTGCTGAATTGATTA |
| 09630 qPCR-F         | GCAACAAGTTAGTCGTCCCT    |
| 09630 qPCR-R         | ATCTTGGTTCCATCCGTTTCA   |
| 10050 qPCR-F         | GAGCAGGTCTATCTTGTGGAAC  |
| 10050 qPCR-R         | CAAGCGTAGGTTGGAAGTATAGG |
| 00770 qPCR-F         | GCCATCATCAGCCATTTCAAG   |
| 00770 qPCR-R         | AAATCTCTCCGCTCCCATAATC  |
| 06890 qPCR-F         | TGGGAAGATTCCGAGAAATTGG  |
| 06890 qPCR-R         | CGCACACCTCTTTGGATGATAG  |
| 09105 qPCR-F         | GGGAGATGACGGTGAAAGATAC  |
| 09105 qPCR-R         | CAATGCCTTCTCCACCTTCT    |
| 02760 (cps2C) qPCR-F | GCCTATGCTCGTTCAGGTTAT   |
| 02760 (cps2C) qPCR-R | CTGTTGTCCCTGCTAGGTAATC  |
| 02775 (cps2F) qPCR-F | CTTGTCGGATTGGTCCTTTCA   |
| 02775 (cps2F) qPCR-R | CAATACTGTTCGGACGGGATAAC |
| 02840 (neuB) qPCR-F  | TAGCACAGATATGCCCGTTTAT  |
| 02840 (neuB) qPCR-R  | ACAGCCATACCAGTTGAAAGA   |
| 07070 qPCR-F         | GGCCTACTCAGCTTCACAAA    |
| 07070 qPCR-R         | GAAGTGGATCACCTGAAGATACC |
| 01650 qPCR-F         | ACTCAACACACAGCCTTCTC    |
| 01650 qPCR-R         | CAACTGTCTAGGACTTGGTTCTT |
| 04460 qPCR-F         | GGATTCAGATATGGACGGTAGAG |

---

---

|                    |                        |
|--------------------|------------------------|
| 04460 qPCR-R       | CAGAGTGGACGGTCTTTGTATT |
| 01235 qPCR-F       | GGCGTAGTCCTTGTTGACTT   |
| 01235 qPCR-R       | ATCCATCTTCGTCCACTTCATC |
| 09295 qPCR-F       | CCCAATCATCGTGGGACTTATC |
| 09295 qPCR-R       | GCATGATACGAGGGCCTAAAT  |
| <i>parC</i> qPCR-R | TGGAGATGCACGGAAACAA    |
| <i>parC</i> qPCR-R | CTCGATGTCAGCCAAGAGATAG |

---

Underlined are restriction cutting sites.

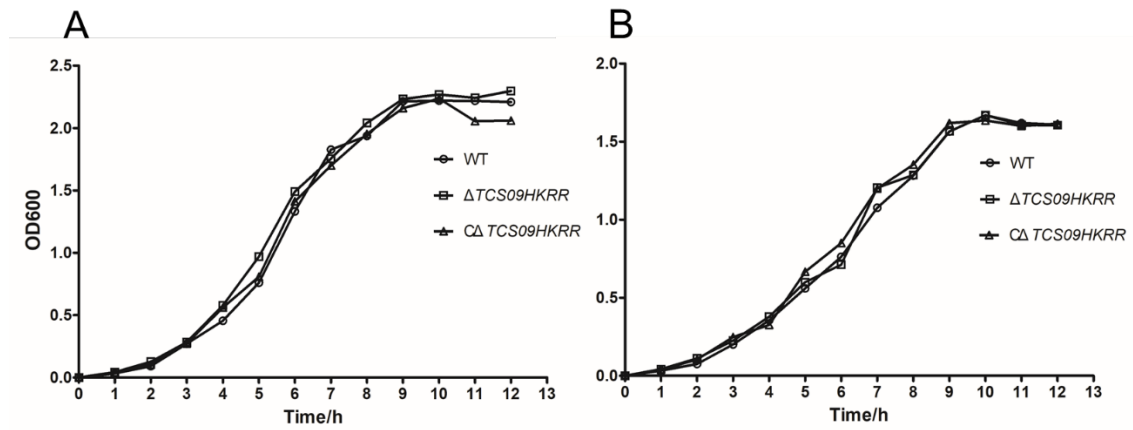

**Supplemental Figure S1 Growth kinetics of WT,  $\Delta TCS09HKRR$  and  $C\Delta TCS09HKRR$  strains in THB under 37°C (A) and 25°C (B). OD<sub>600</sub>**

values are the means from three independent experiments.

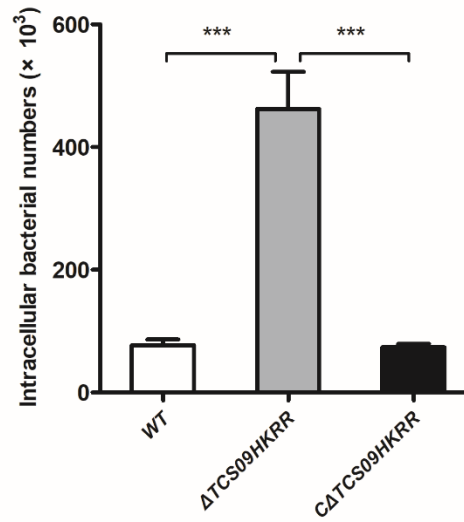

**Supplemental Figure S2 Effect of the *TCS09HKRR* deletion on the ability of SS2 to resist 3D4/21 cells phagocytosis.** At 1.5 h postinfection, cells were washed and incubated in DMEM containing antibiotics (penicillin and gentamicin) for another 1.5 h. Then the cells were washed again and lysed to enumerate the CFU.

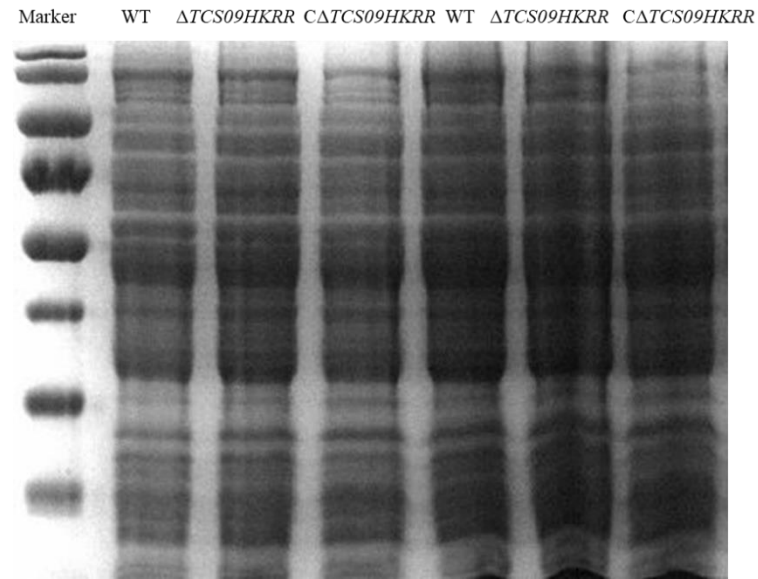

**Supplemental Figure S3** Surface proteins of WT,  $\Delta TCS09HKRR$ , and  $C\Delta TCS09HKRR$  were compared in SDS-PAGE analysis. The protein quantity in right 3 lanes were double than that in left 3 lanes.

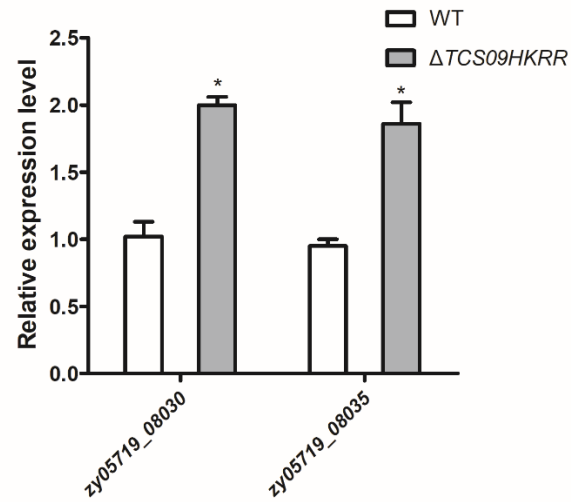

**Supplemental Figure S4** Transcription levels of *zy05719\_08030*, and *zy05719\_08035* genes in WT and  $\Delta TCS09HKRR$  strains were measured by qRT-PCR. qRT-PCR results are represented as means  $\pm$  SD from three independent experiments. Asterisks indicate significant differences (\*,  $P < 0.05$ ).

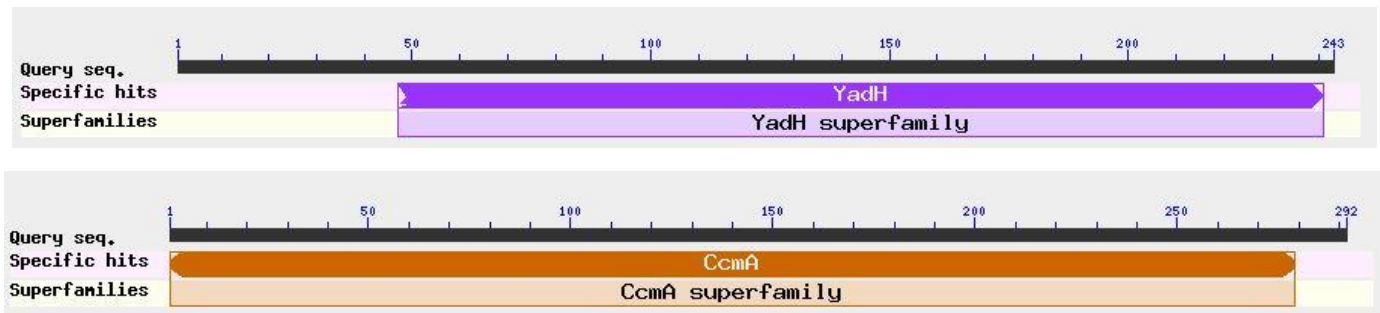

**Supplemental Figure S5 Homology analyses of the ZY05719\_08030 and ZY05719\_08035 proteins by the protein BLAST algorithm. The ZY05719\_08030 show to have putative conserved domain YadH, and ZY05719\_08035 show to have putative conserved domain CcmA.**



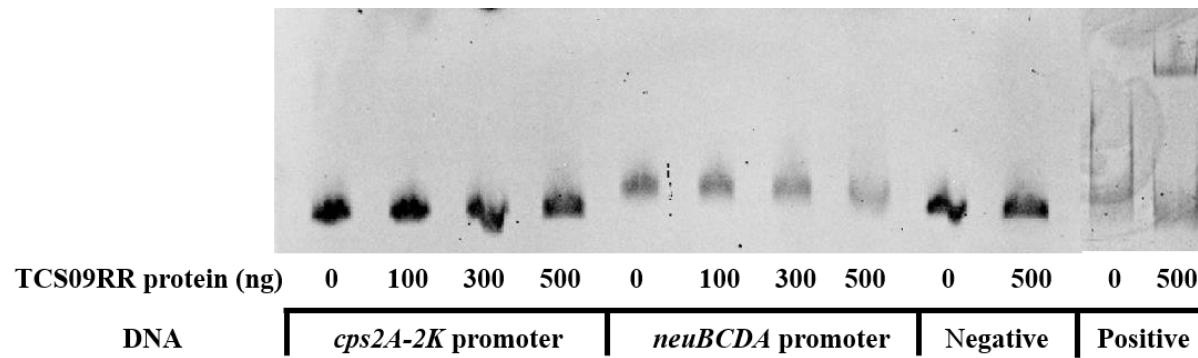

**Supplemental Figure S6** An EMSA showed that TCS09RR indirectly regulated the CPS synthesis clusters. The recombinant TCS09RR protein with increasing amounts was added to the reaction mixture. The *TCS09HKRR* promoter region were used as the positive control, and fragments amplified from 16S rRNA served as the negative control.

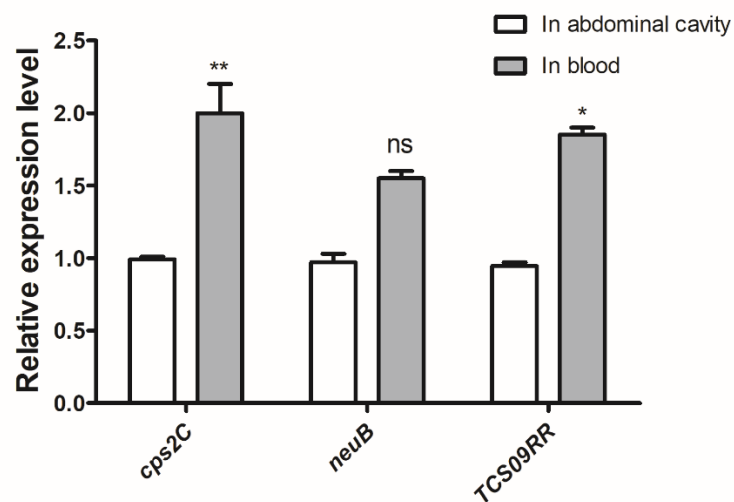

**Supplemental Figure S7** Transcription levels of *cps2C*, *neuB* and *TCS09RR* in host before and after SS2 entering blood circulation were measured by qRT-PCR. qRT-PCR results are represented as means  $\pm$  SD from three independent experiments. Asterisks indicate significant differences (ns,  $P > 0.05$ ; \*,  $P < 0.05$ ; \*\*,  $P < 0.01$ ).

## References

1. Takamatsu D, Osaki M, Sekizaki T. 2001. Thermosensitive suicide vectors for gene replacement in *Streptococcus suis*. *Plasmid* 46:140-8.
2. Takamatsu D, Osaki M, Sekizaki T. 2001. Construction and characterization of *Streptococcus suis*-*Escherichia coli* shuttle cloning vectors. *Plasmid* 45:101-13.
